# Supplementary material for: Photochromic properties of terarylene derivatives having a π-conjugation unit on central aromatic ring
Source: Royal Society of Chemistry journal article supplement (doi:10.1039/b823413b), 2009-01-01
Supplement: b823413b.pdf [file b823413b.pdf]

## Supplementary Material

### Photochromic properties of terarylene derivatives having $\pi$ -conjugation unit on their central aromatic ring

Yuichiro Kutsunugi, Shigekazu Kawai, Takuya Nakashima, Tsuyoshi Kawai\*

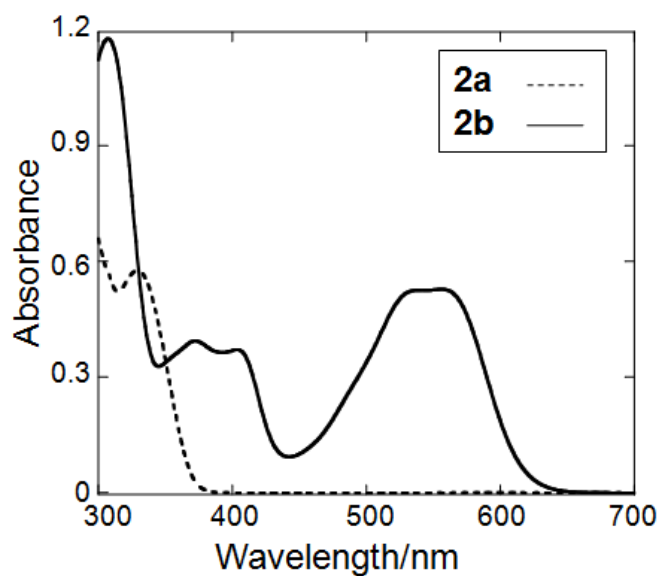

Fig. S1. Absorption spectra change of **2** in hexane: open-form **a** (dotted lines), closed-form **b** (solid lines). The concentrations of **2** were  $4.4 \times 10^{-6}$  M respectively.
